# Supplementary material for: Raman spectroscopy‐based diagnostics of water deficit and salinity stresses in two accessions of peanut
Source: PubMed Central journal article supplement (PMC8377774; doi:10.1002/pld3.342), 2021-08-20
Supplement: PLD3-5-e342-s001.pdf [file PLD3-5-e342-s001.pdf]

## Raman Spectroscopy-Based Diagnostics of Water Deficit and Salinity Stresses in Two Accessions of Peanut – Response to Editor Comments

L. 32: Please change to "RS and chemometrics could identify control and stressed plants of the susceptible accession (either water deficit or salinity) with 95 and 80% accuracy."

We have changed the sentence to read:

“RS and chemometrics could identify control and stressed (either water deficit or salinity) susceptible plants with 95 and 80% accuracy just one day after treatment.”

L. 35: Since the lower percentage of accuracy for the tolerant cultivar was added here, the next sentence needs rephrasing; 65 to 69% is arguably not highly specific or sensitive. Please remove the word "great" from line 37.

We have changed the sentence to read:

The high selectivity and specificity for pre-symptomatic identification of abiotic stresses in the susceptible line provides evidence for the potential of Raman-based surveillance in commercial-scale agriculture and digital farming.

L. 170: Replace "(control, H)" with "(control, C)".

We have addressed this. Thank you.

L. 188: Replace "healthy" with "control"

We have addressed this. Thank you.

L. 216/217: Specify on which day the tolerant lines showed visible signs of stress.

We have added the following information to address this.

In both [tolerant](#) and [susceptible](#) plants, visual signs of stress appeared on days 2 and 3 for drought and salinity, respectively. [The tolerant plants may have showed stress responses sooner because the stress occurred more quickly under greenhouse conditions than in field conditions.](#)

L. 273 onwards: Provide a reference here, and how many scans would be needed according to those references.

We have added a passage around line 273 explaining how different sampling sizes or analysis methods could improve the prediction results.

L. 274: Rephrase to: "Although drought tolerant cultivars are preferred, RS has the potential to

detect early plant stress on a specific cultivar by incorporating a sufficient number of calibration scans."

We have rephrased as requested.

L. 90 & 292: Formatting error (dot before bracket, no space).

Thank you for pointing these out. They have been addressed.
